# Supplementary material for: The α9 Nicotinic Acetylcholine Receptor Mediates Nicotine-Induced PD-L1 Expression and Regulates Melanoma Cell Proliferation and Migration
Source: MDPI journal article supplement (doi:10.3390/cancers11121991), 2019-12-11

# Supplementary Materials: The $\alpha 9$ Nicotinic Acetylcholine Receptor Mediates Nicotine-Induced PD-L1 Expression and Regulates Melanoma Cell Proliferation and Migration

Hai Duong Nguyen, You-Cheng Liao, Yuan-Soon Ho, Li-Ching Chen, Tzu-Chun Cheng, Hui-Wen Chang, Donald Liu, Woan-Ruoh Lee, Shing-Chuan Shen, Chih-Hsiung Wu and Shih-Hsin Tu

**Table S1.** The chi-square test was employed to assess the correlation between  $\alpha 9$ -nChAR and PD-L1 expression in the tissue microarrays ( $n = 192$ ) as categorical variables.

| Tissue microarrays             | $\alpha 9$ -nAChR low mRNA<br><i>n</i> (%) | $\alpha 9$ -nAChR high mRNA<br><i>n</i> (%) | <i>p</i> -value       |
|--------------------------------|--------------------------------------------|---------------------------------------------|-----------------------|
| PD-L1 low mRNA - <i>n</i> (%)  | 79 (81%)                                   | 25 (26%)                                    | $1.8 \times 10^{-14}$ |
| PD-L1 high mRNA - <i>n</i> (%) | 18 (19%)                                   | 70 (74%)                                    |                       |

**Table S2.** RT-PCR primers.

| Primer name               | Primer sequence                                                                                                                                      |
|---------------------------|------------------------------------------------------------------------------------------------------------------------------------------------------|
| $\alpha 1$ -nAChR         | F: 5'-GAGTCTAACAATGCGGCG-3'<br>R: 5'-TTTCTGCTCATCCTTGCTG-3'                                                                                          |
| $\alpha 2$ -nAChR         | F: 5'-TCCTGTGTTCTGTCTTCA-3'<br>R: 5'-GGTCCTCAGTCTCGGTATG-3'                                                                                          |
| $\alpha 3$ -nAChR         | F: 5'-GAGAAGGTGACCCTGTG-3'<br>R: 5'-GTGATGACGATGGACAAGGTTA-3'                                                                                        |
| $\alpha 4$ -nAChR         | F: 5'-GTTGGCGTATTTGCGTC-3'<br>R: 5'-GAGAGGTCAATCCACGG-3'                                                                                             |
| $\alpha 5$ -nAChR         | F: 5'-ACGCTTCCCAAACCTGCT-3'<br>R: 5'-CTTCAACAACCTCACGG-3'                                                                                            |
| $\alpha 6$ -nAChR         | F: 5'-ACGCTTTGTATTTAGTCTT-3'<br>R: 5'-GGGTGCGGTAGTGTATG-3'                                                                                           |
| $\alpha 7$ -nAChR         | F: 5'-CGGCAAGAGGAGTGAAA-3'<br>R: 5'-GAACACCAGCAGGGCGA-3'                                                                                             |
| $\alpha 9$ -nAChR         | F: 5'-AGGGTGGTCATCCTGAAAT-3'<br>R: 5'-AGGTCCTTTGTTCTGGC-3'                                                                                           |
| $\alpha 10$ -nAChR        | F: 5'-CACAAGGGAGCACTCAT-3'<br>R: 5'-CCAATACCCAGCACAAAC-3'                                                                                            |
| PD-L1                     | F: 5'-AGG TGC GTT CAG ATG TTG GC-3'<br>R: 5'-TGC CCA AGG CAG CAA ATC CAG-3'                                                                          |
| GAPDH                     | F: 5'-ATCCCATCACCATCTTCCAG-3'<br>R: 5'-GCTGATGATCTTGAGGCTGT-3'                                                                                       |
| PD-L1 promotor            | F: 5'-GAC CTG GCT GCA CTA ATT GTC-3'<br>R: 5'-CAT TTC CCA GGG AGA GCT GG-3'                                                                          |
| $\alpha 9$ -nAChR-siRNA-1 | F: 5'-GATCCCCACCAATGTGGTCTGCGGTCAAGAGA<br>CCGCAGGACCACATTGGTGTGTTTAA-3'<br>R: 5'-AGCTTAAAAACACCAATGTGGTCTGCGGTCTCTT<br>GAACCGCAGGACCACATTGGTGGGG-3'  |
| $\alpha 9$ -nAChR-siRNA-2 | F: 5'-GATCCCCAGACCACAAGGCCACCAATTTCAAG<br>AGAATTGGTGGCCTTGTTGTTTAA-3'<br>R: 5'-AGCTTAAAAAAGACCACAAGGCCACCAATT<br>CTCTTGAAATTGGTGGCCTTGTTGTTGCTGGG-3' |

|                                              |                                                                                                                                                        |
|----------------------------------------------|--------------------------------------------------------------------------------------------------------------------------------------------------------|
| $\alpha 9$ -nAChR-scramble                   | F: 5'-GATCCCCGAGAACACGAATACACCCCTTCAA<br>GAGAGGGGTGTATTCGTGTTCTCTTTTAA-3'<br>R: 5'-AGCTTAAAAAGAGAACACGAATACACCCCTCTC<br>TTGAAGGGGTGTATTCGTGTTCTCGGG-3' |
| pcDNA3.1 to $\alpha 9$ -nAChR overexpression | F: 5'-AATAAGCTTGCCGCCACCATGAACTGGTCCCATTCTG-3'<br>R: 5'-ATAGAATTCACATCCGCTCTTGCTATGA-3'                                                                |

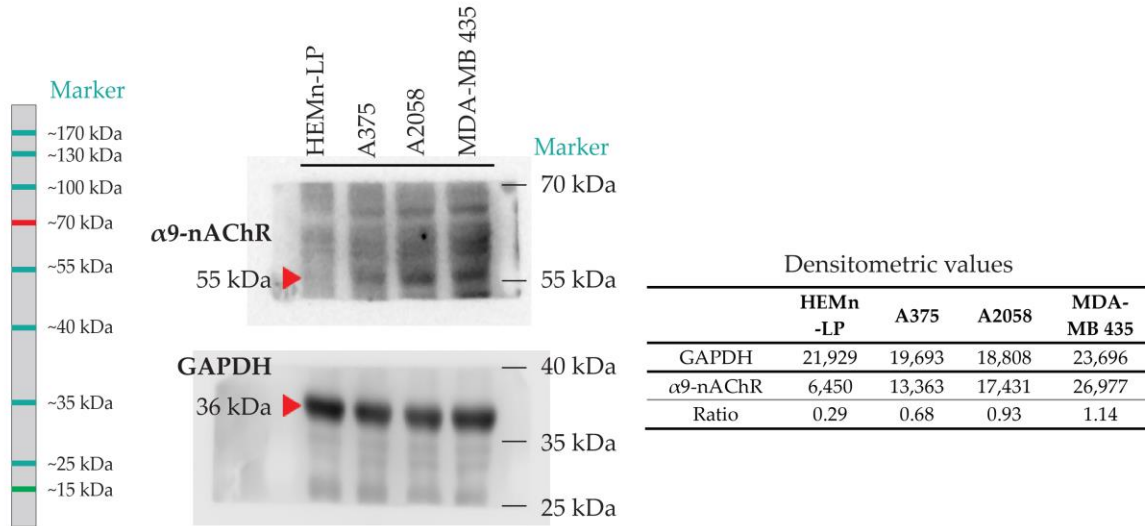

**Figure S1.** Uncropped scans with size marker indications of western blots shown in Figure 1D, and densitometry readings/intensity ratios.

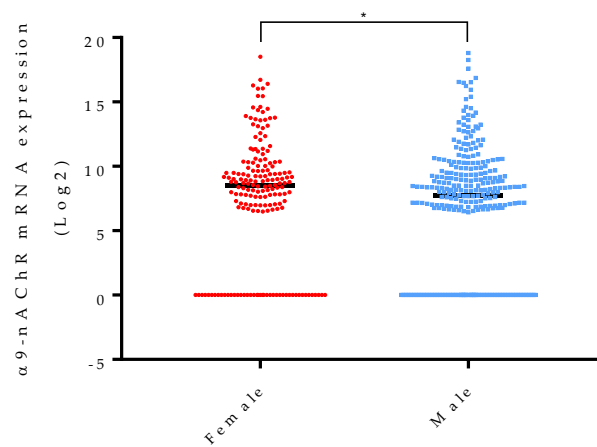

**Figure S2.**  $\alpha 9$ -nAChR mRNA level in female ( $n = 179$ ) and male ( $n = 293$ ) groups. The result was analyzed from TCGA-SKCM cohort ( $n = 472$ ). The data were analyzed by the Mann-Whitney test. The median of  $\alpha 9$ -nAChR expression in each group is shown by the horizontal line; \*  $p < 0.05$ .

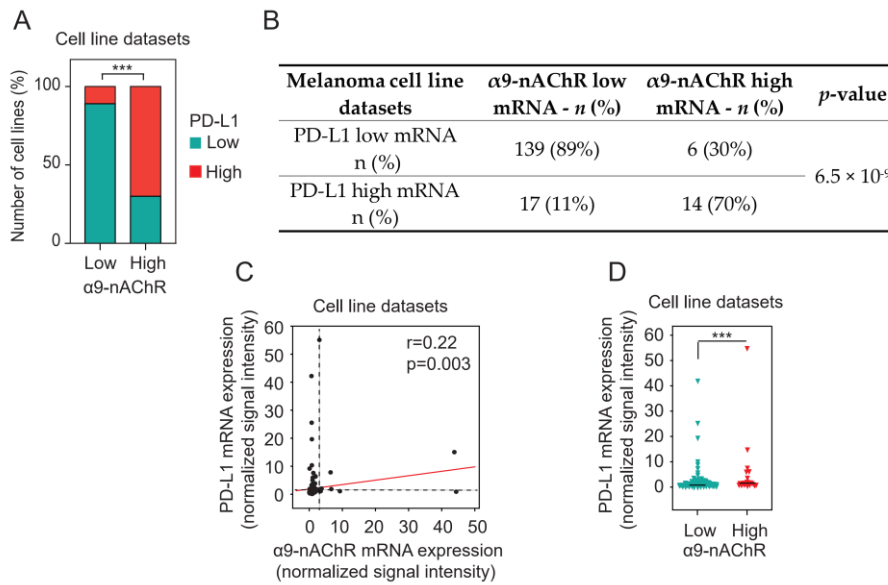

**Figure S3.** Correlation between  $\alpha 9$ -nAChR and PD-L1 mRNA expression in the melanoma cell line datasets. **(A, B)** The association between  $\alpha 9$ -nAChR and PD-L1 mRNA levels in the melanoma cell line datasets ( $n = 176$ ) as categorical variables. The  $\chi^2$  test was employed to assess the correlation between  $\alpha 9$ -nAChR and PD-L1 expression in samples.  $** p < 0.01$ . **(C)** Correlation between  $\alpha 9$ -nAChR and PD-L1 mRNA expression in the melanoma cell line datasets ( $n = 176$ ). Pearson and Spearman's rank correlation measured the strength of the association between  $\alpha 9$ -nAChR and PD-L1 expression. **(D)** PDL1 mRNA expression in melanoma cell lines with low ( $n = 156$ ) or high ( $n = 20$ )  $\alpha 9$ -nAChR expression in the melanoma cell line datasets. The data were analyzed by the Mann-Whitney test. The median  $\alpha 9$ -nAChR expression in each group is shown by a horizontal line.  $*** p < 0.001$ .

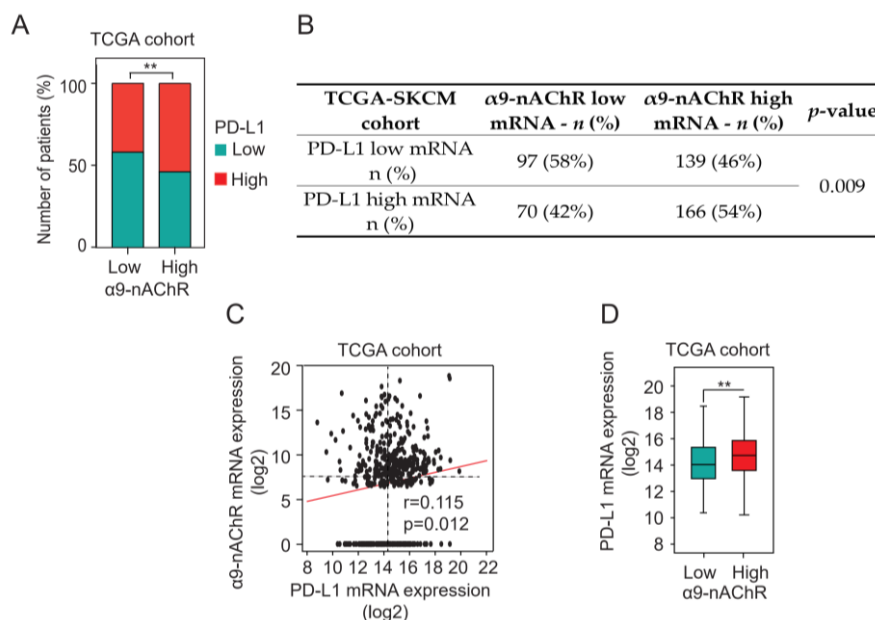

**Figure S4.** Correlation between  $\alpha 9$ -nAChR and PD-L1 mRNA expression in the TCGA-SKCM cohort. **(A, B)** The association between  $\alpha 9$ -nAChR and PD-L1 mRNA levels in the TCGA-SKCM cohort ( $n=472$ ) as categorical variables. The  $\chi^2$  test was employed to assess the correlation between  $\alpha 9$ -nAChR and PD-L1 expression in samples.  $** p < 0.01$ . **(C)** Correlation between  $\alpha 9$ -nAChR and PD-L1 mRNA expression in the TCGA-SKCM cohort ( $n = 472$ ). Pearson and Spearman's rank correlation measured the strength of the association between  $\alpha 9$ -nAChR and PD-L1 expression. **(D)** PD-L1 mRNA expression in patients in the TCGA-SKCM cohort with high ( $n = 305$ ) or low  $\alpha 9$ -nAChR ( $n = 167$ ) expression. The data are presented as the mean  $\pm$  SD,  $** p < 0.01$ , Student's t-test.

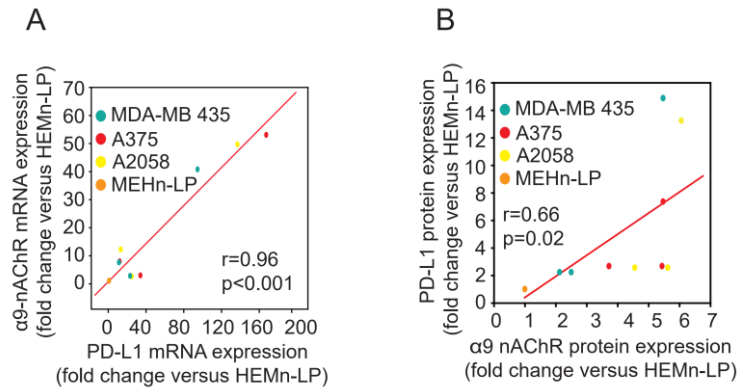

**Figure S5.** Correlations between  $\alpha 9$ -nAChR and PD-L1 in melanoma cell lines. **(A, B)** Correlations between  $\alpha 9$ -nAChR and PD-L1 mRNA and protein levels in the HEMn-LP, A375, A2058, and MDA-MB 435 cell lines. The experiments were repeated three times per cell line. Band intensities were measured using ImageJ software and the amounts of  $\alpha 9$ -nAChR and PD-L1 at the mRNA and protein levels in the A375, A2058, and MDA-MB 435 melanoma cells were normalized to the  $\alpha 9$ -nAChR and PD-L1 mRNA and protein levels in the HEMn-LP cells.

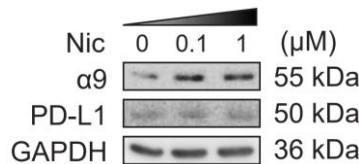

**Figure S6.** Nicotine-induced  $\alpha 9$ -nAChR activity did not influence PD-L1 protein levels in the HEMn-LP melanocytes. The results were determined by western blotting.

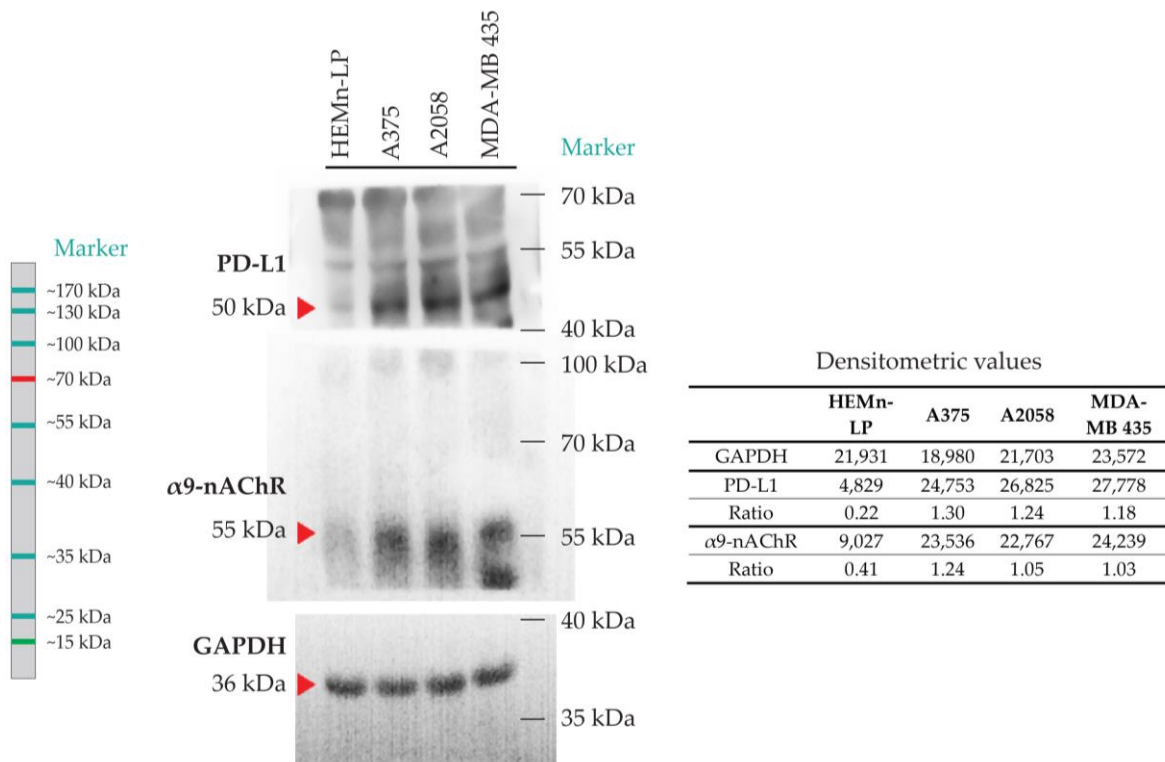

**Figure S7.** Uncropped scans with size marker indications of western blots shown in Figure 2L, and densitometry readings/intensity ratios.

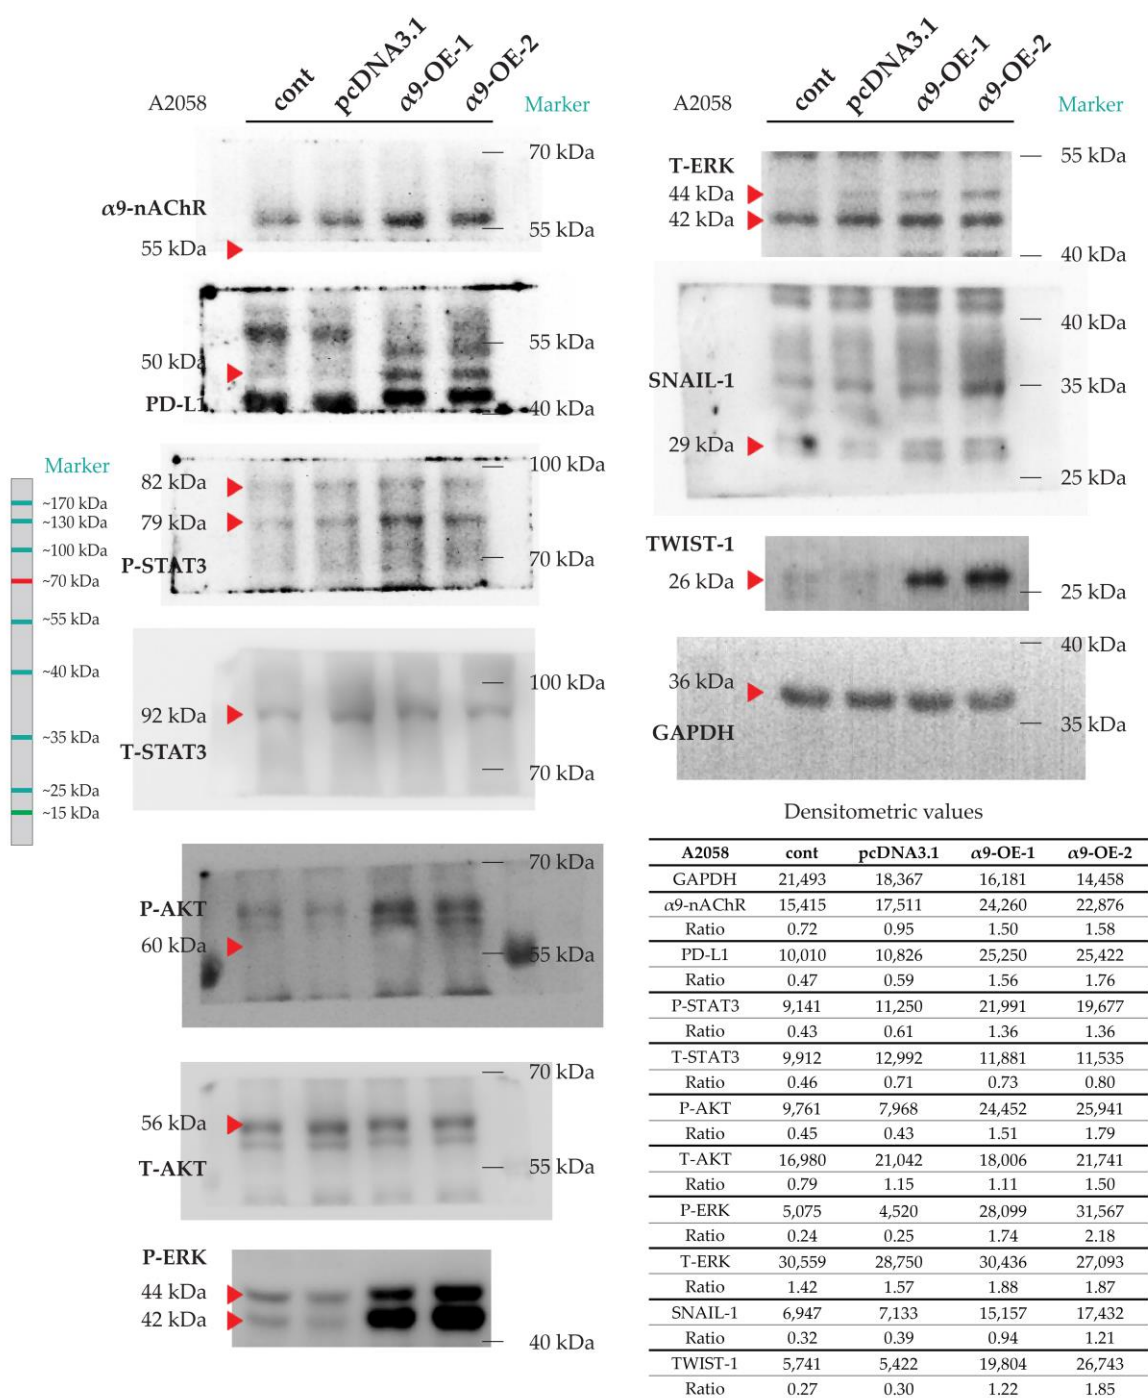

**Figure S8.** Uncropped scans with size marker indications of western blots shown in Figure 3A, and densitometry readings/intensity ratios.

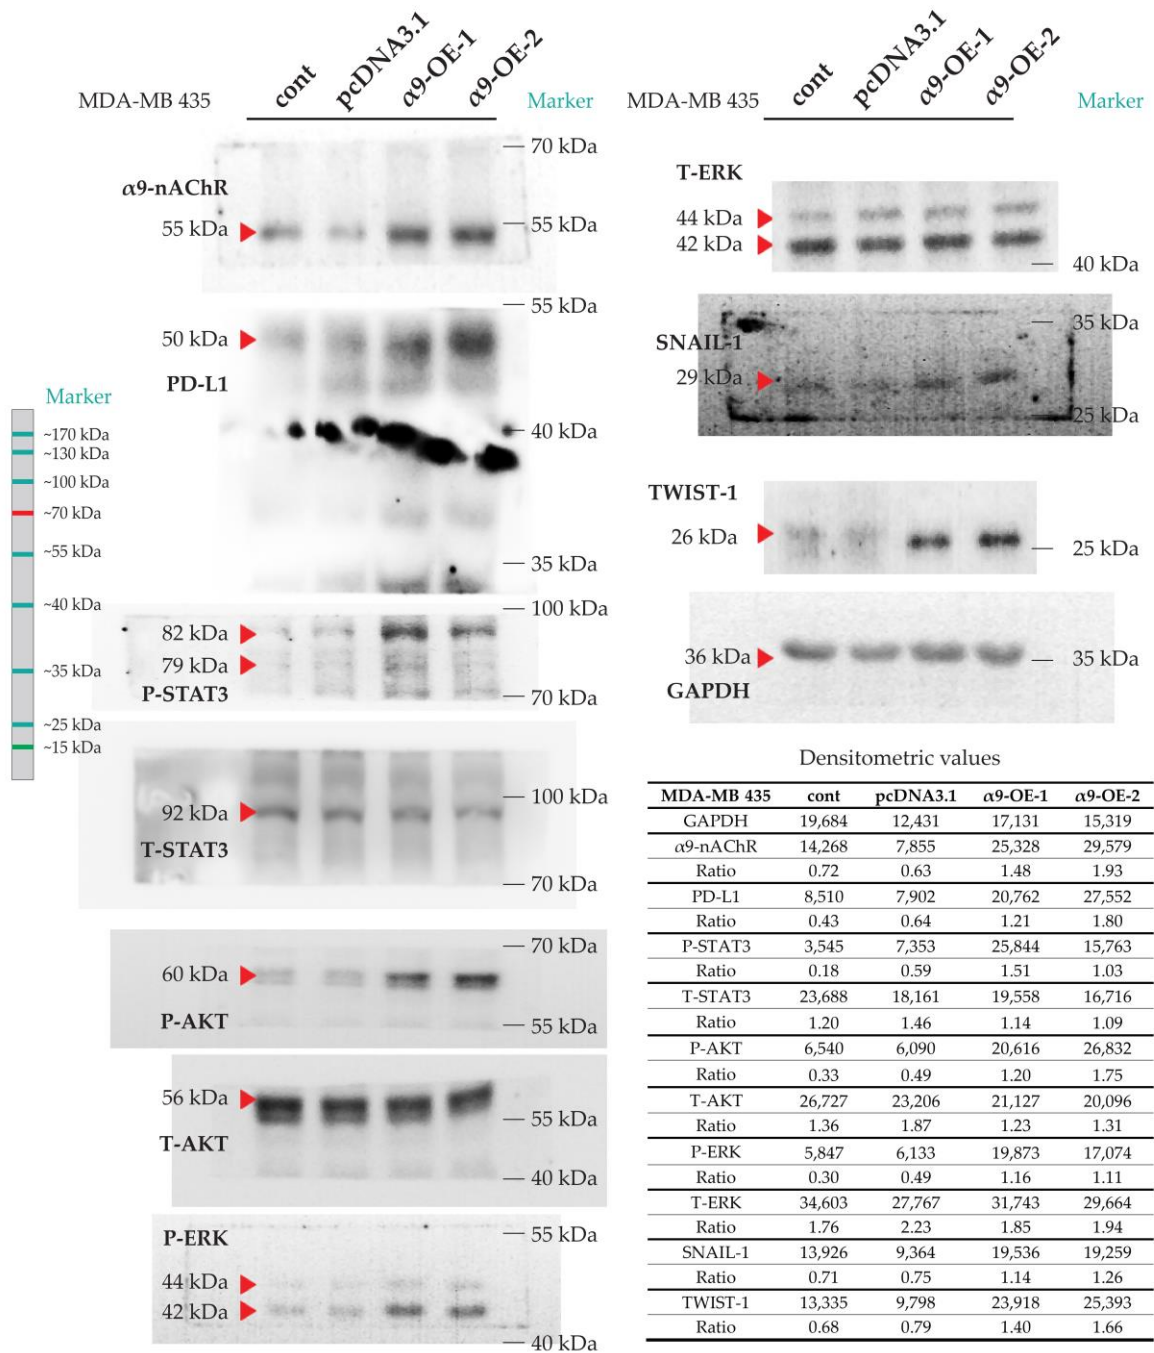

**Figure S8.** Uncropped scans with size marker indications of western blots shown in Figure 3A (continued), and densitometry readings/intensity ratios.

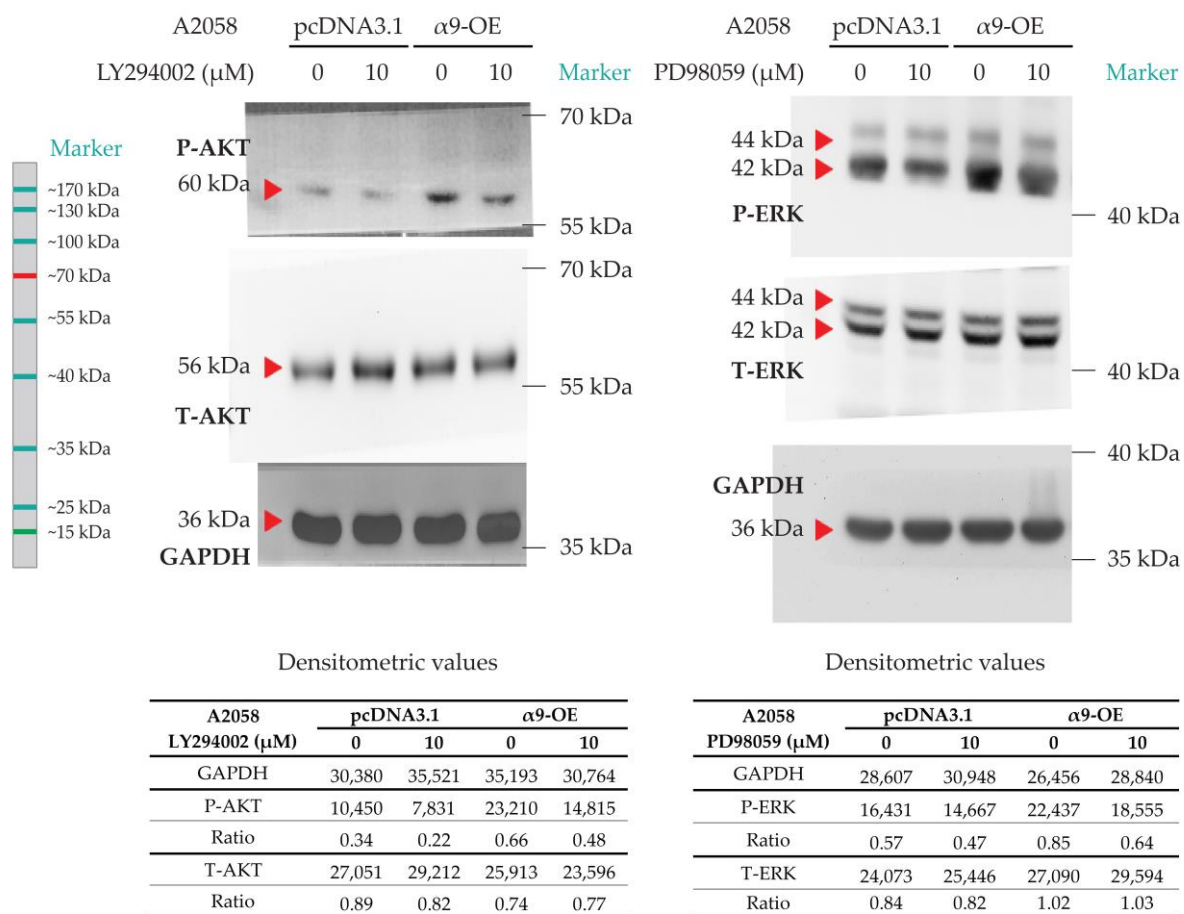

**Figure S9.** Uncropped scans with size marker indications of western blots shown in Figure 3J and Figure 3L, and densitometry readings/intensity ratios.

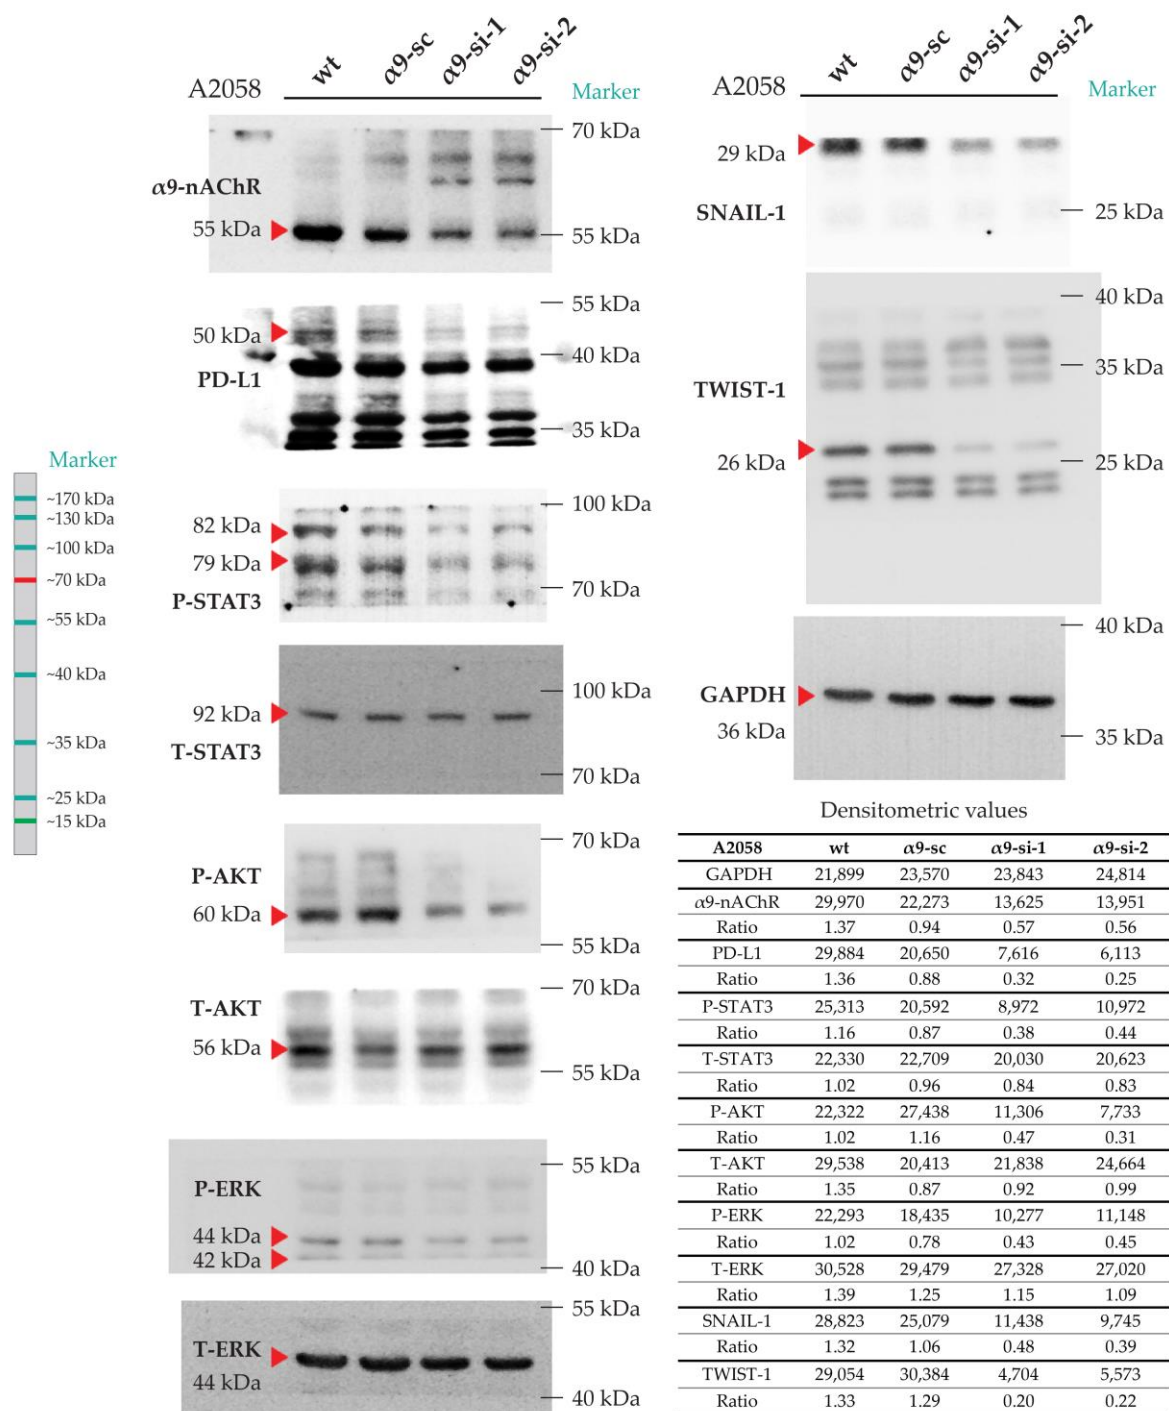

**Figure S10.** Uncropped scans with size marker indications of western blots shown in Figure 4A, and densitometry readings/intensity ratios.



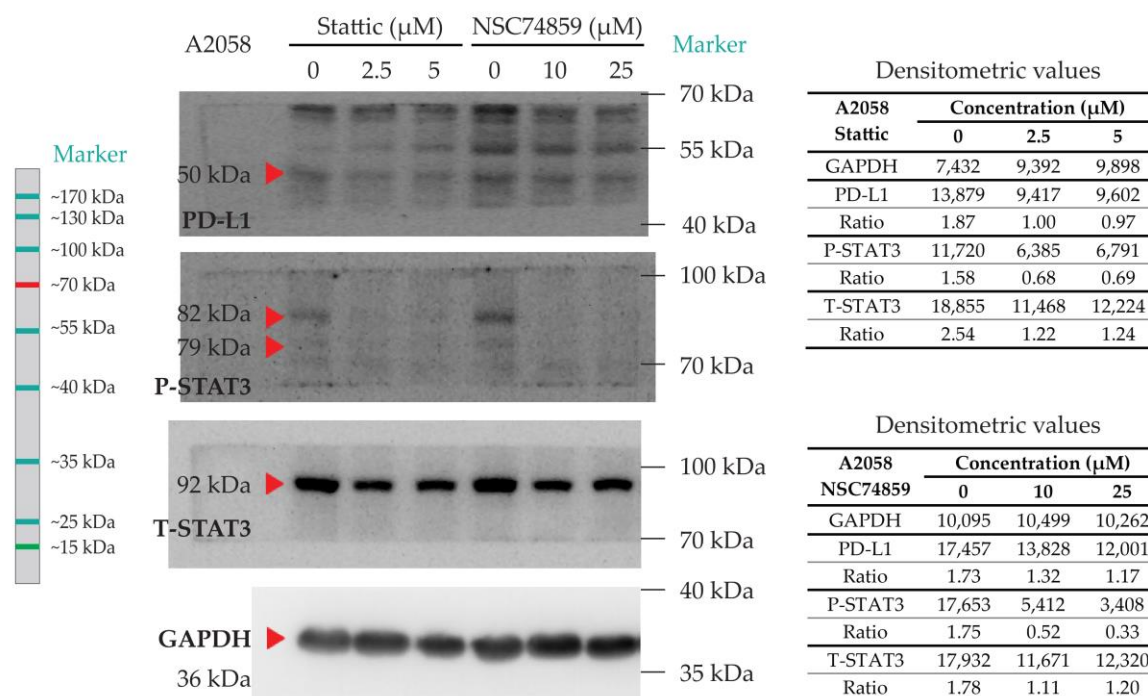

**Figure S11.** Uncropped scans with size marker indications of western blots shown in Figure 4G, and densitometry readings/intensity ratios.

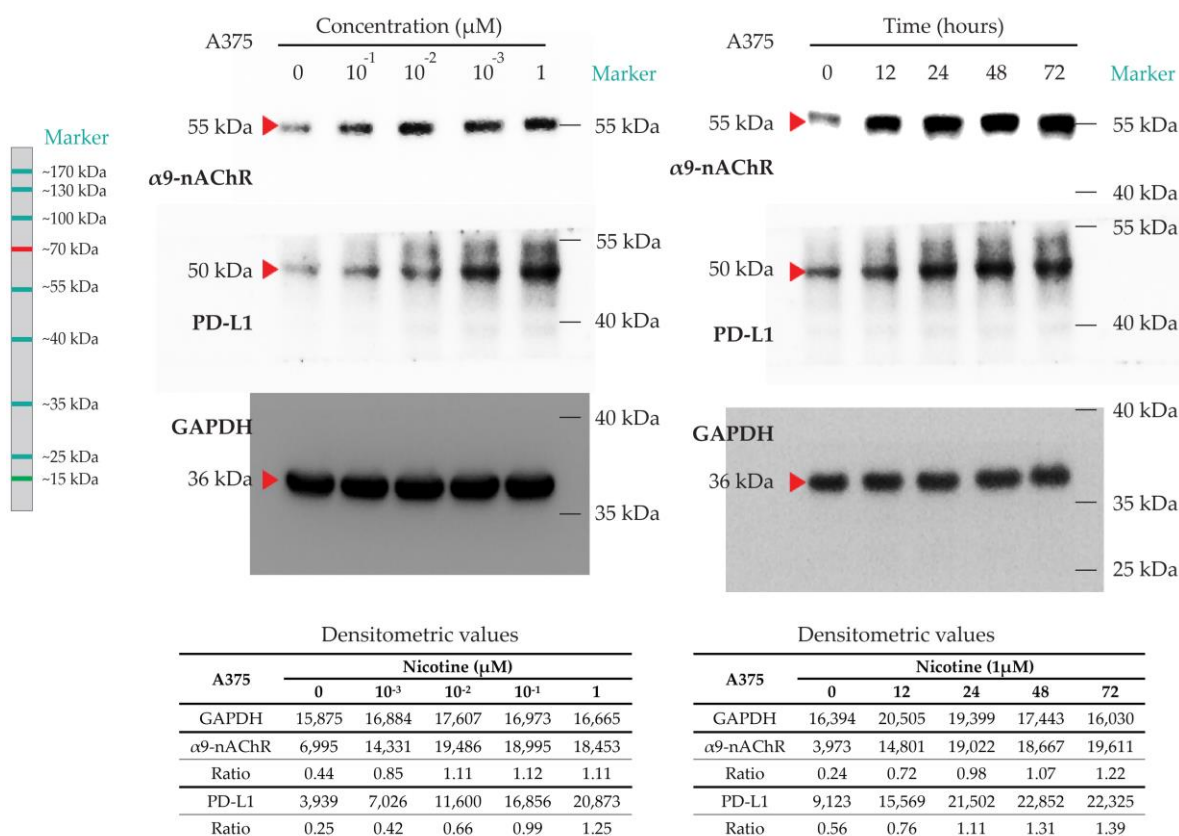

**Figure S12.** Uncropped scans with size marker indications of western blots shown in Figure 5B, and densitometry readings/intensity ratios.

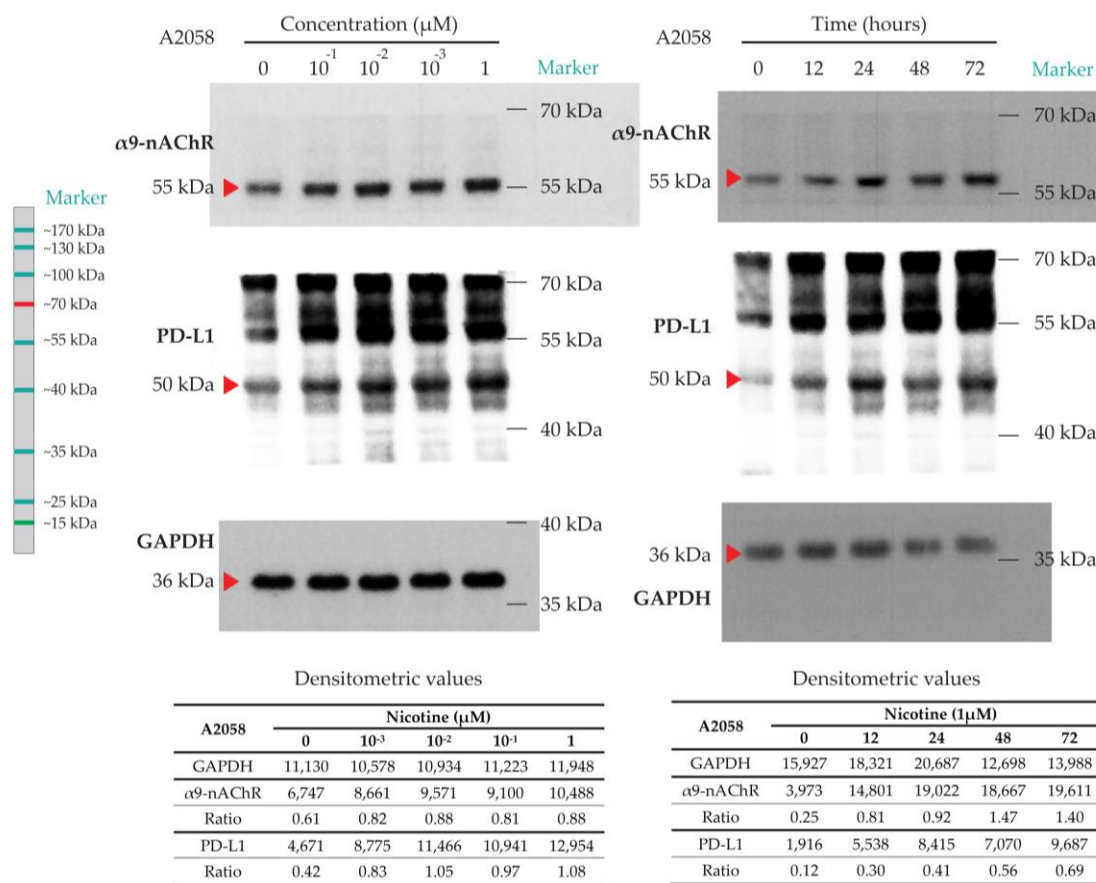

**Figure S12.** Uncropped scans with size marker indications of western blots shown in Figure 5B (continued), and densitometry readings/intensity ratios.

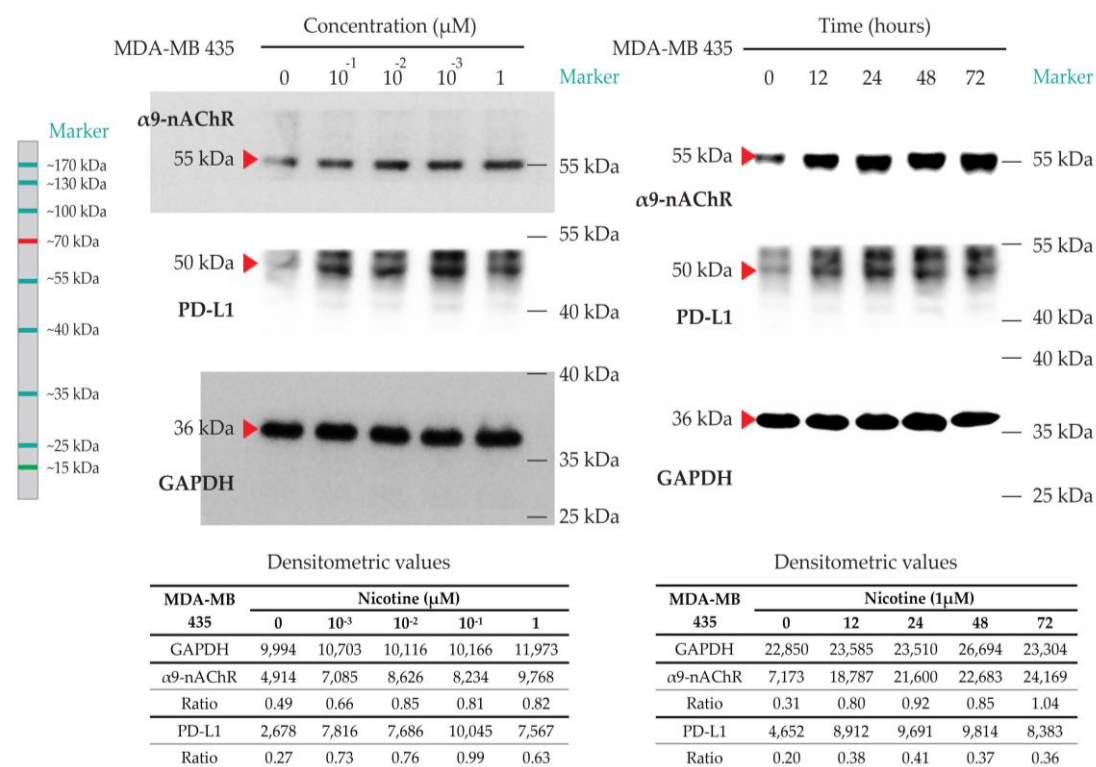

**Figure S12.** Uncropped scans with size marker indications of western blots shown in Figure 5B (continued), and densitometry readings/intensity ratios.

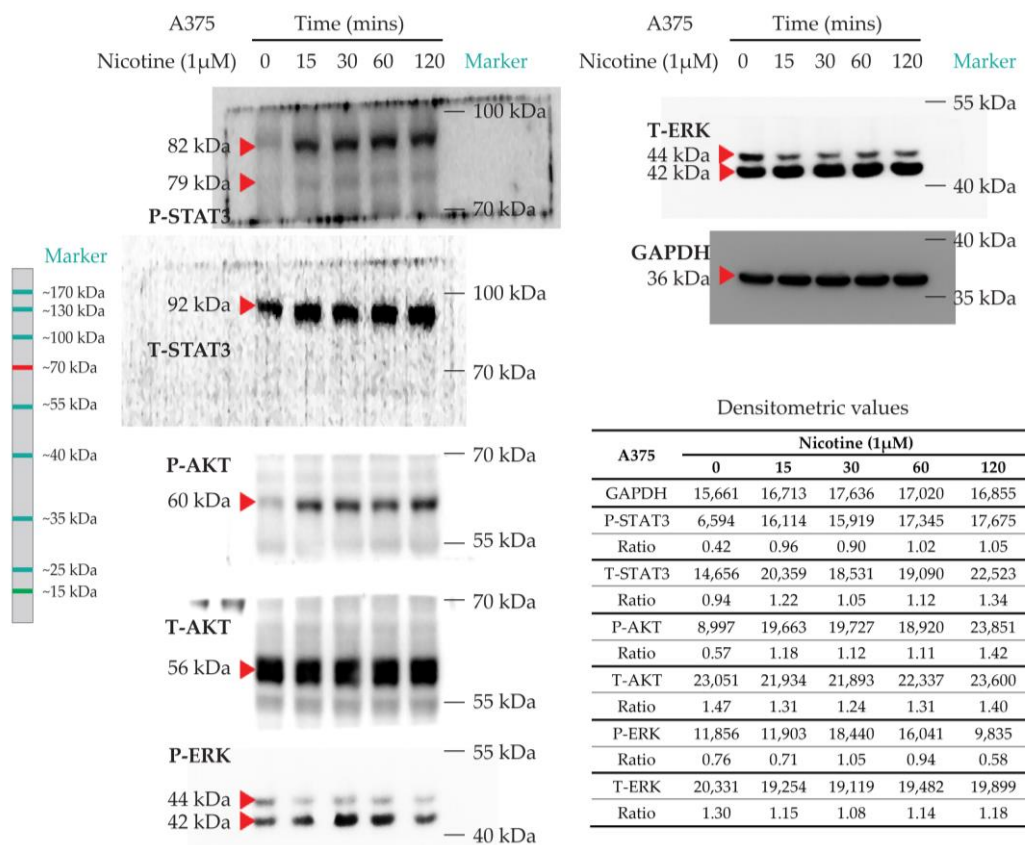

**Figure S13.** Uncropped scans with size marker indications of western blots shown in Figure 6A, and densitometry readings/intensity ratios.

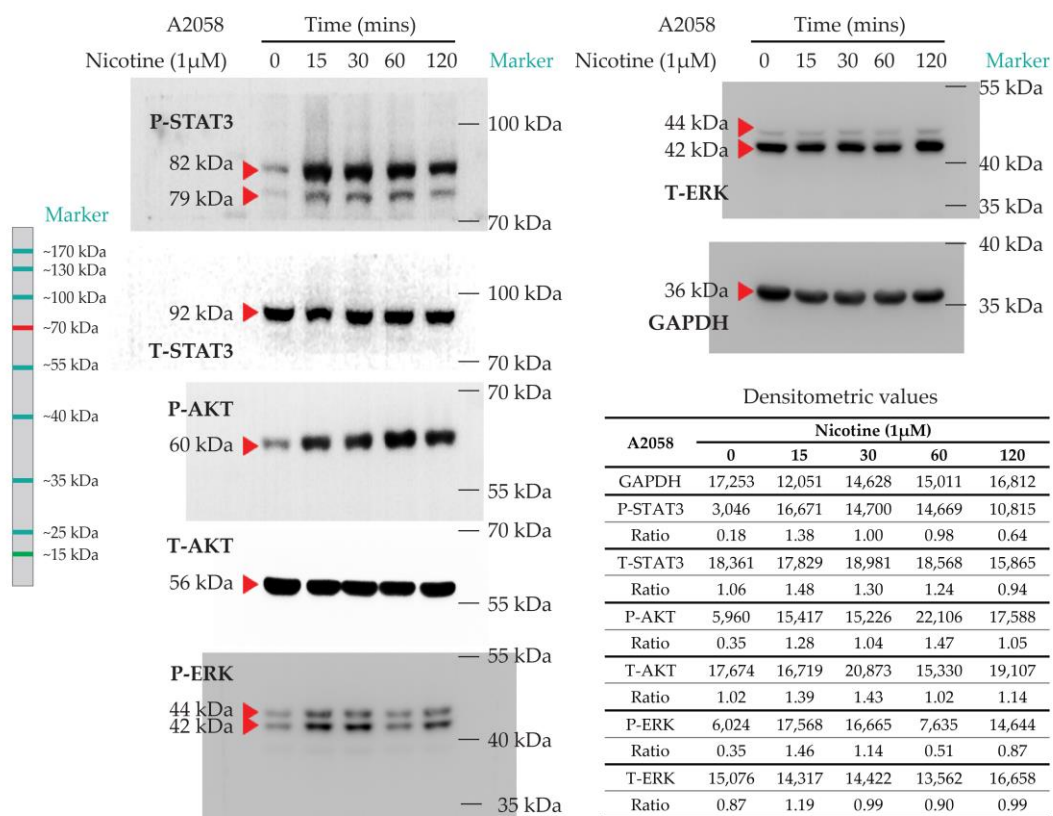

**Figure S13.** Uncropped scans with size marker indications of western blots shown in Figure 6A (continued), and densitometry readings/intensity ratios.

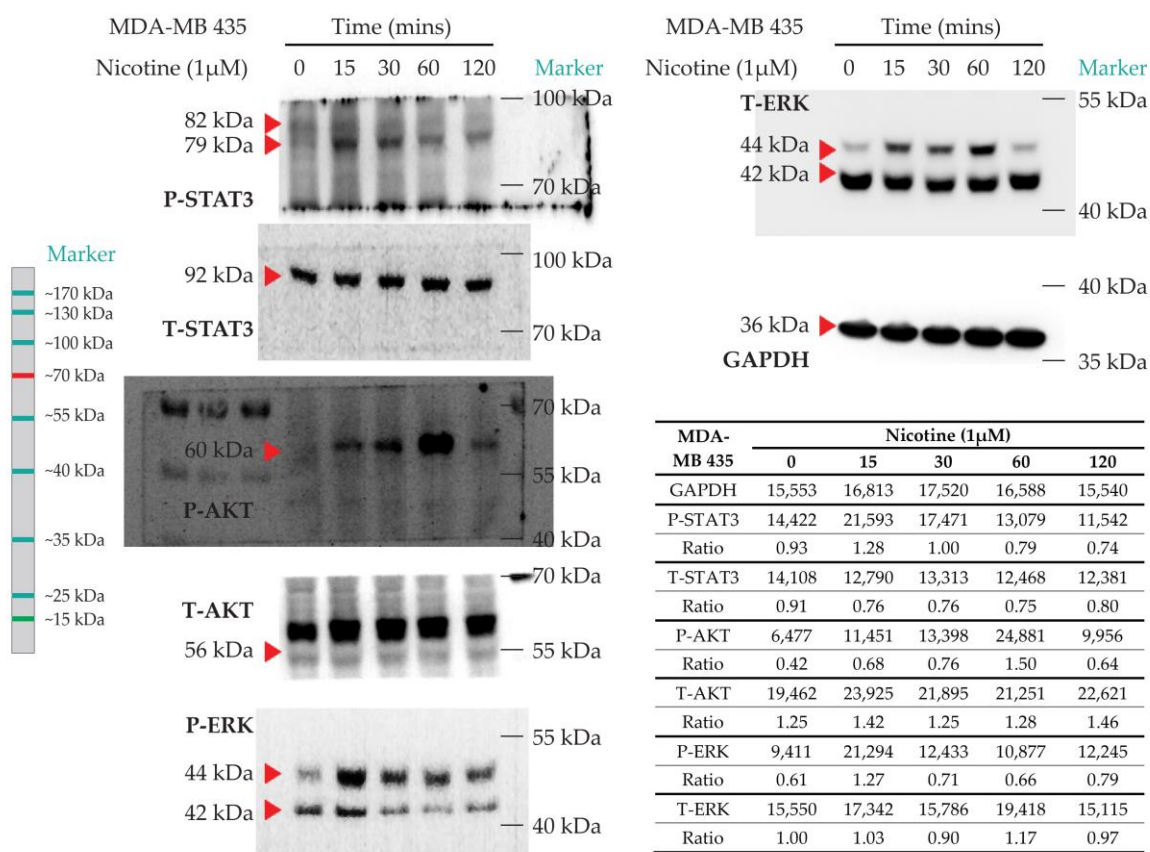

**Figure S13.** Uncropped scans with size marker indications of western blots shown in Figure 6A (continued), and densitometry readings/intensity ratios.

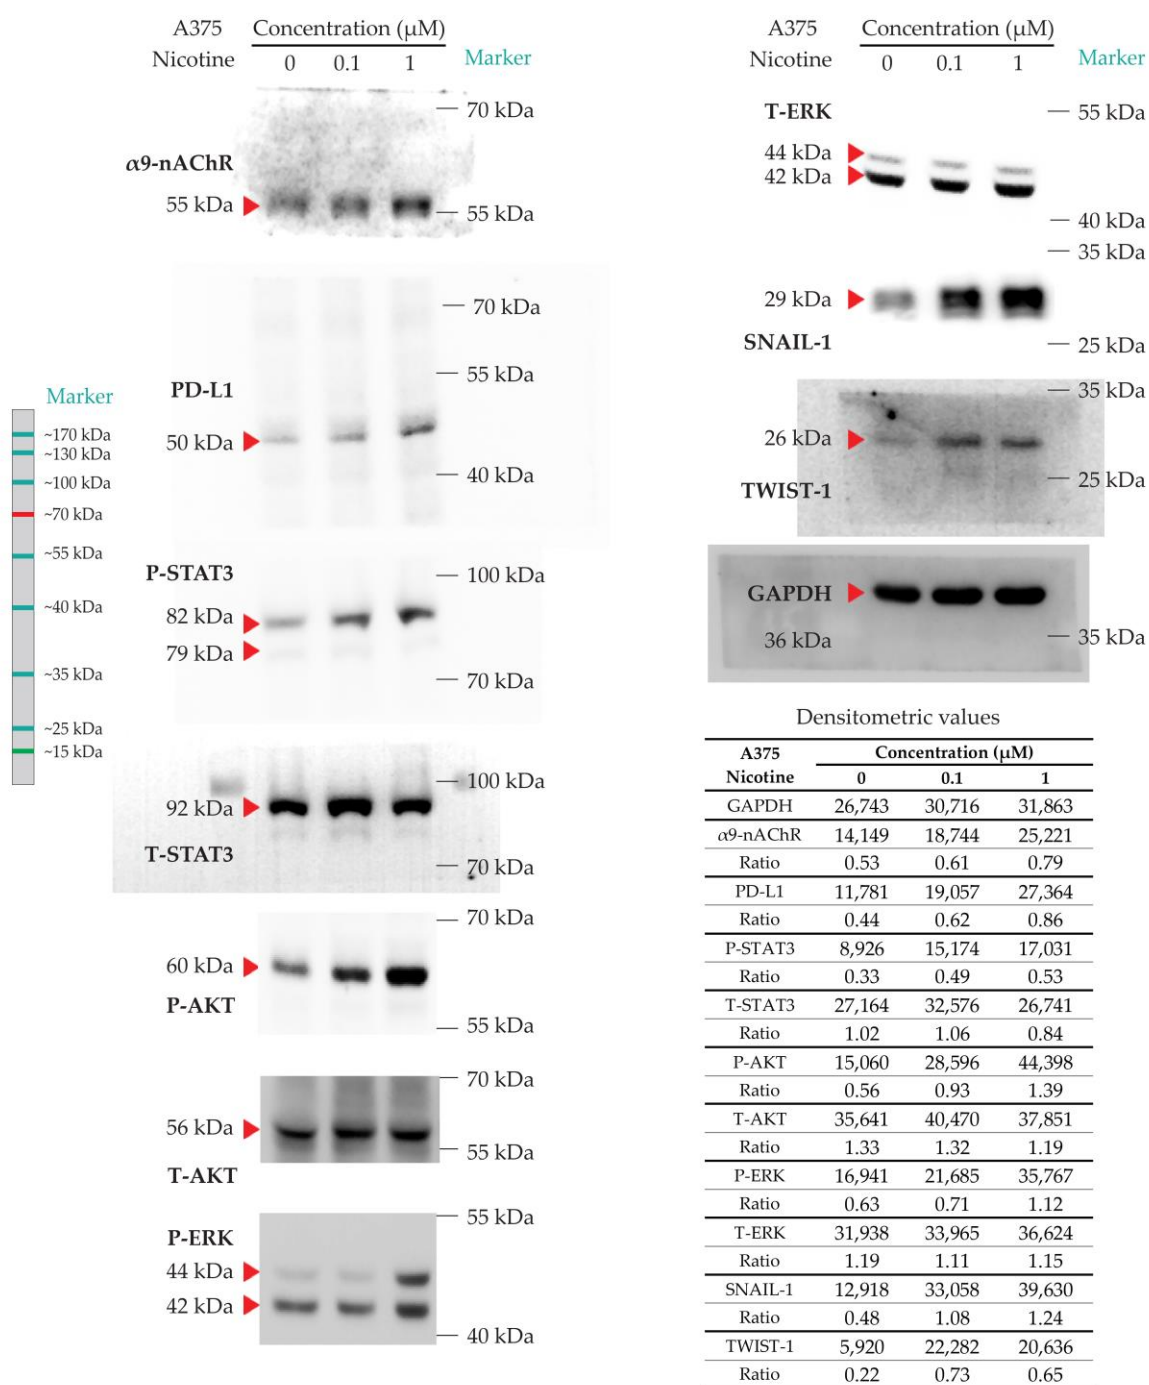

**Figure S14.** Uncropped scans with size marker indications of western blots shown in Figure 6B, and densitometry readings/intensity ratios.

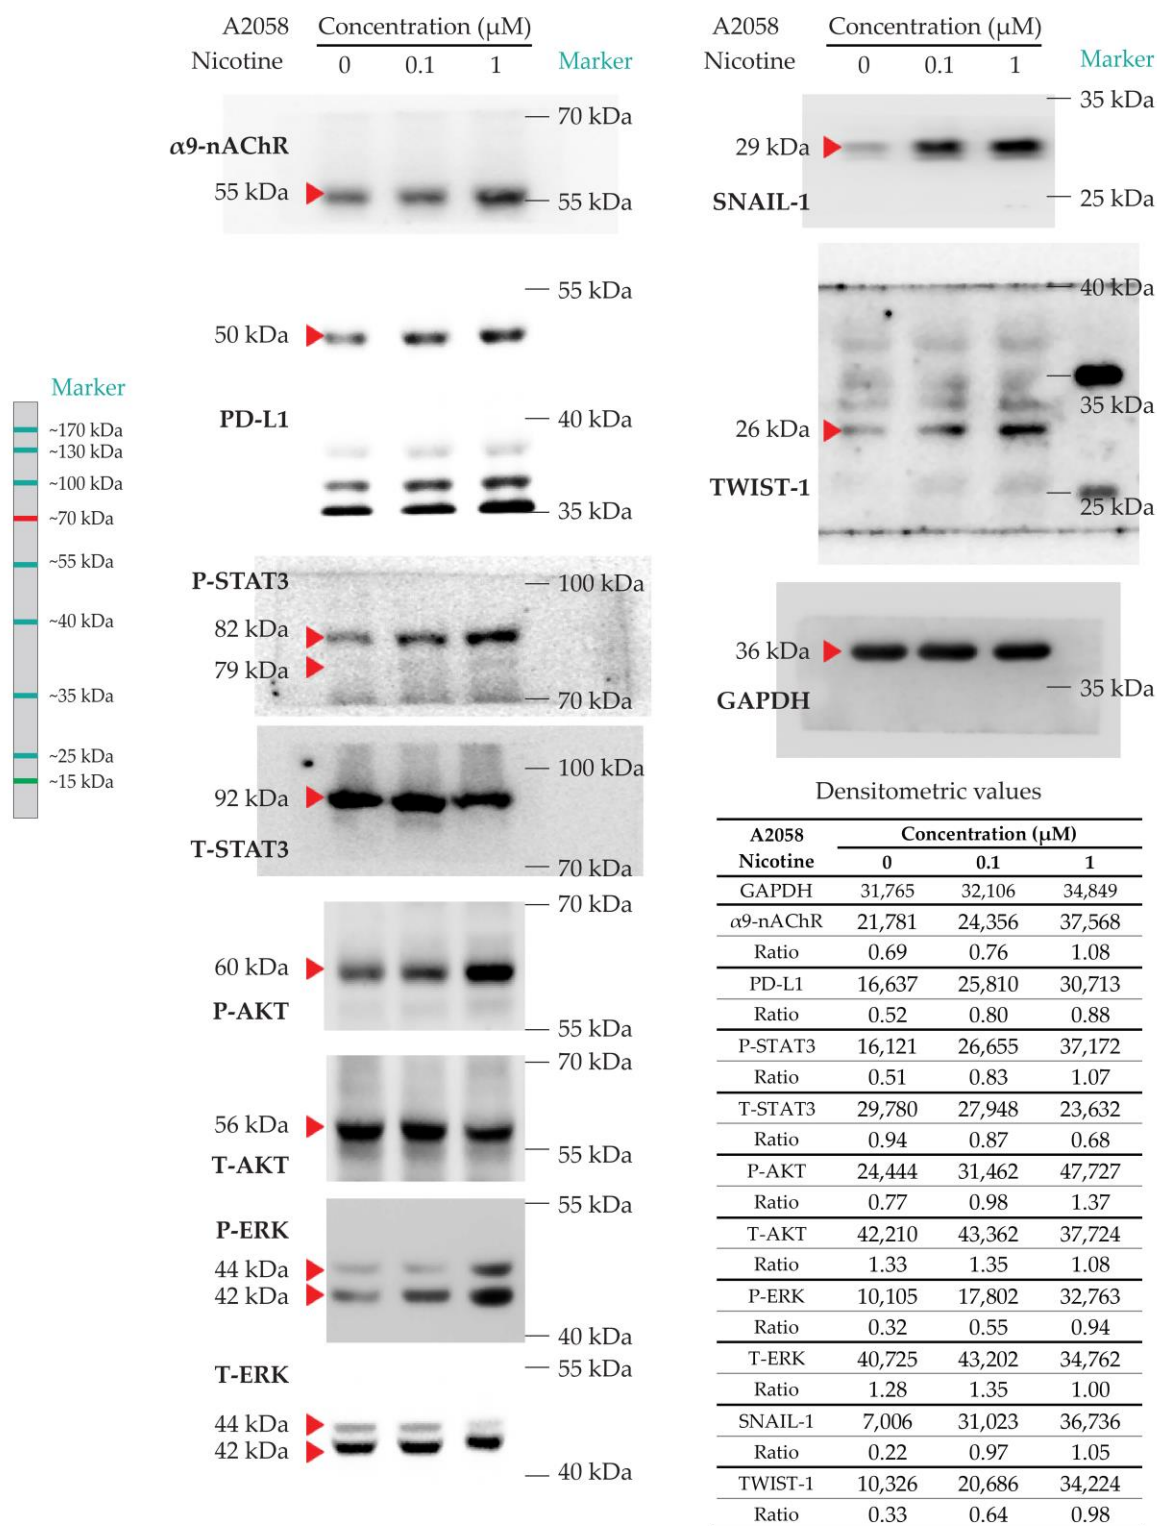

**Figure S14.** Uncropped scans with size marker indications of western blots shown in Figure 6B (continued), and densitometry readings/intensity ratios.

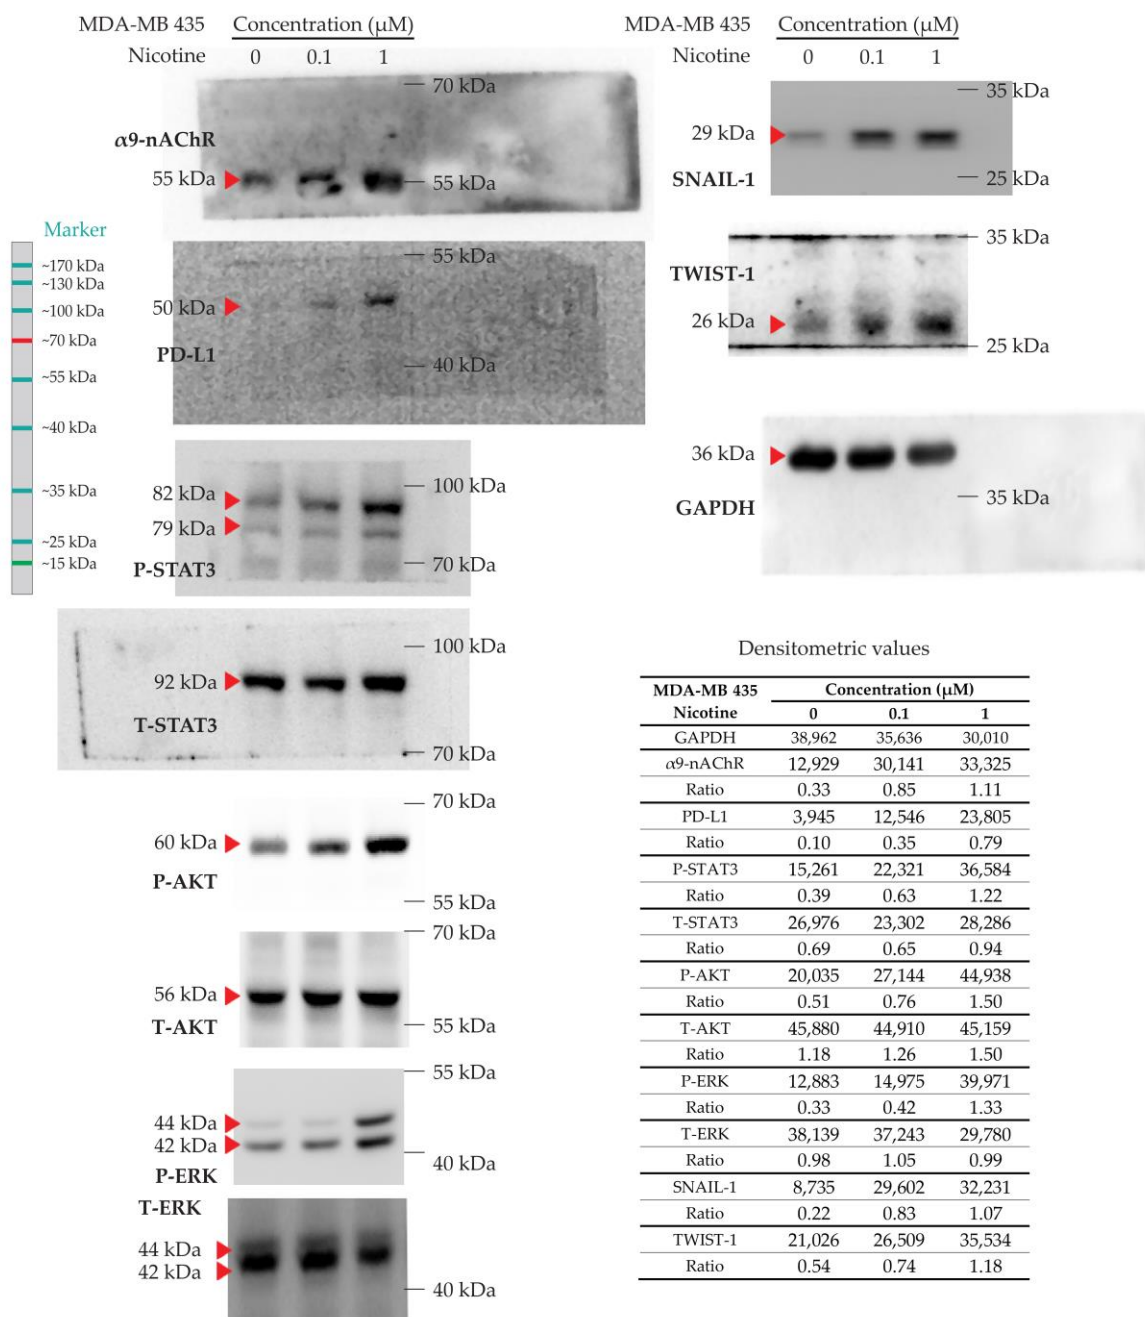

**Figure S14.** Uncropped scans with size marker indications of western blots shown in Figure 6B (continued), and densitometry readings/intensity ratios.

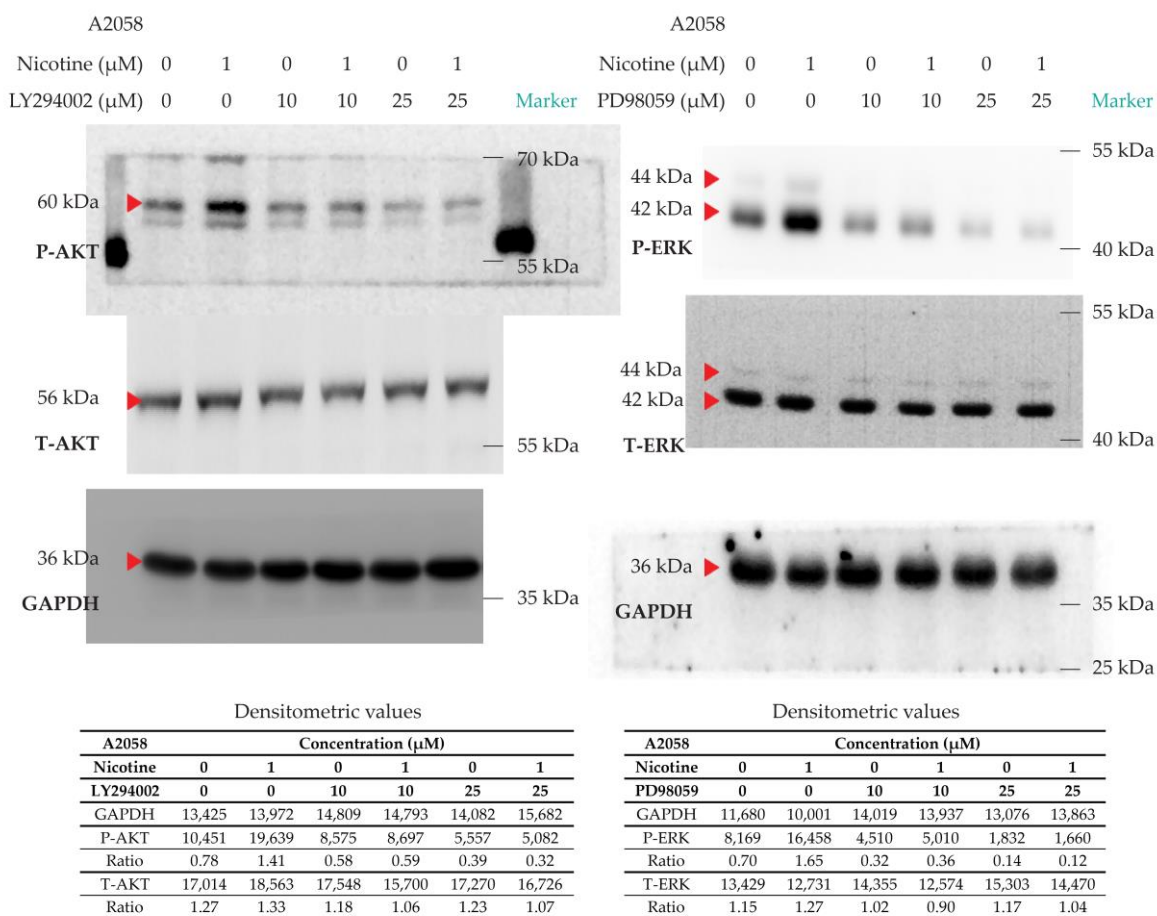

**Figure S15.** Uncropped scans with size marker indications of western blots shown in Figure 6D and Figure 6F, and densitometry readings/intensity ratios.



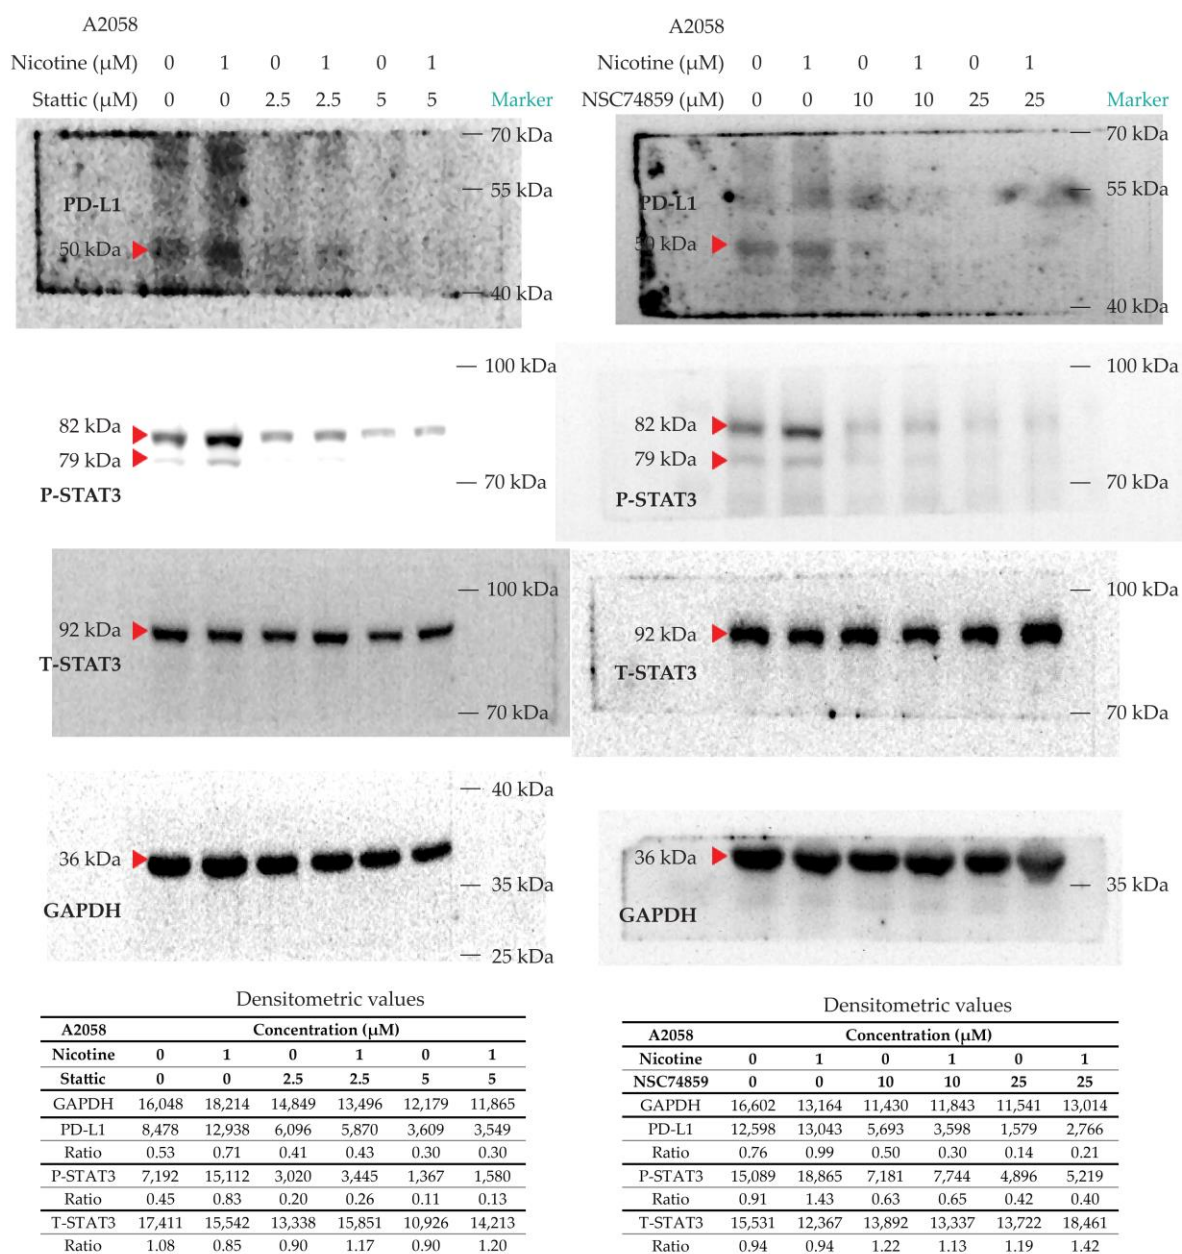

**Figure S16.** Uncropped scans with size marker indications of western blots shown in Figure 6H and Figure 6J, and densitometry readings/intensity ratios.

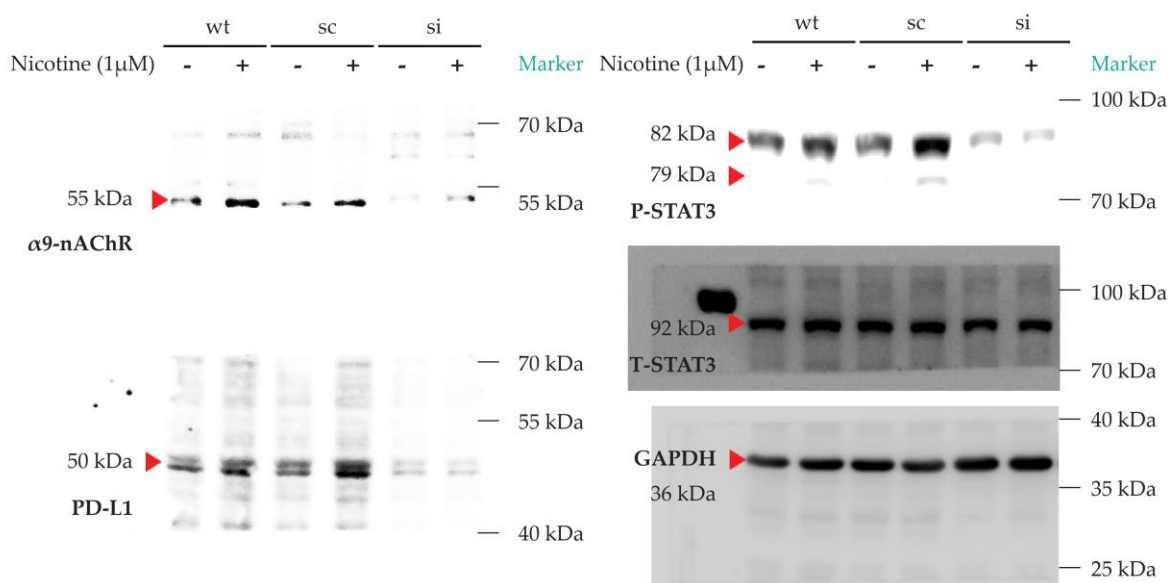

Densitometric values

| A2058<br>Nicotine (μM) | wt     |        | sc     |        | si     |        |
|------------------------|--------|--------|--------|--------|--------|--------|
|                        | 0      | 1      | 0      | 1      | 0      | 1      |
| GAPDH                  | 13,880 | 15,871 | 14,151 | 13,371 | 17,932 | 18,247 |
| α9-nAChR               | 7,146  | 16,009 | 4,481  | 10,083 | 2,584  | 3,254  |
| Ratio                  | 0.51   | 1.01   | 0.32   | 0.75   | 0.14   | 0.18   |
| PD-L1                  | 8,887  | 16,402 | 10,992 | 19,563 | 2,217  | 1,533  |
| Ratio                  | 0.64   | 1.03   | 0.78   | 1.46   | 0.12   | 0.08   |
| P-STAT3                | 8,893  | 14,436 | 9,795  | 19,517 | 2,399  | 1,162  |
| Ratio                  | 0.64   | 0.91   | 0.69   | 1.46   | 0.13   | 0.06   |
| T-STAT3                | 17,780 | 21,730 | 18,772 | 19,406 | 16,168 | 15,797 |
| Ratio                  | 1.28   | 1.37   | 1.33   | 1.45   | 0.90   | 0.87   |

**Figure S17.** Uncropped scans with size marker indications of western blots shown in Figure 6K, and densitometry readings/intensity ratios.

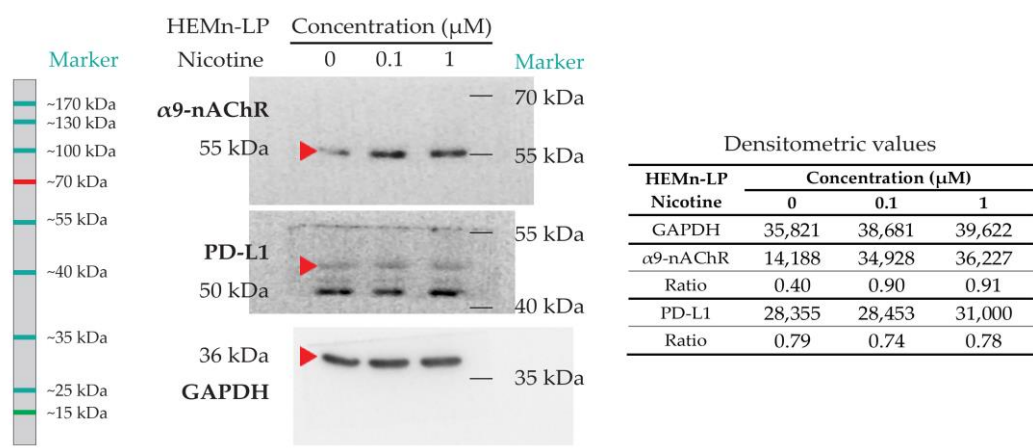

**Figure S18.** Uncropped scans with size marker indications of western blots shown in Figure S5, and densitometry readings/intensity ratios.

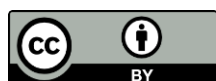

Supplement: s1 [file s1]
